# Supplementary material
Source: Springer Nature journal article supplement (https://www.springermedizin.de/resource/supplementary/12907_2013_142_MOESM8_ESM.pdf/9524734)

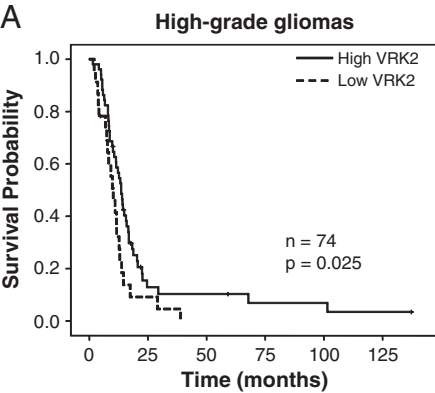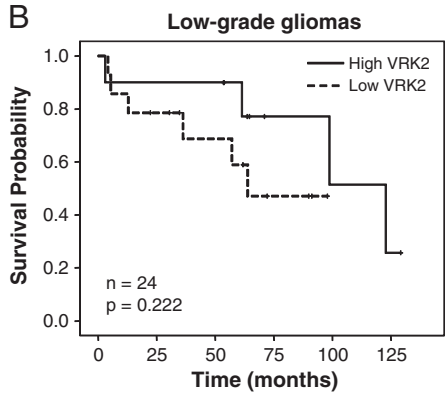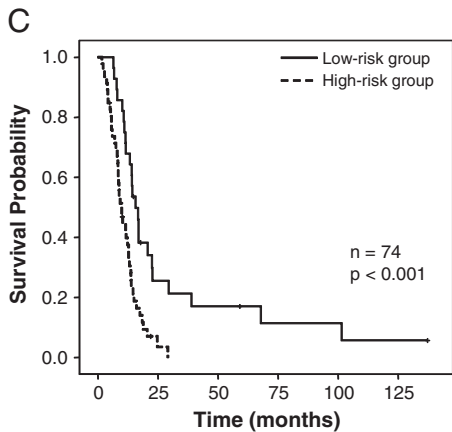

Supplement: MOESM8 [file 9524734]
